# Supplementary material for: Hsc70/Stub1 promotes the removal of individual oxidatively stressed peroxisomes
Source: PubMed Central journal article supplement (PMC7573593; doi:10.1038/s41467-020-18942-3), 2020-10-19
Supplement: 41467_2020_18942_MOESM1_ESM.pdf [file 41467_2020_18942_MOESM1_ESM.pdf]

## **Supplementary information**

### **Hsc70/Stub1 promotes the removal of individual oxidatively stressed peroxisomes**

**Chen et al.**

#### **Table of Contents:**

**-Supplementary Figures 1-11**

**-Supplementary Tables 1-2**

## Supplementary Figures

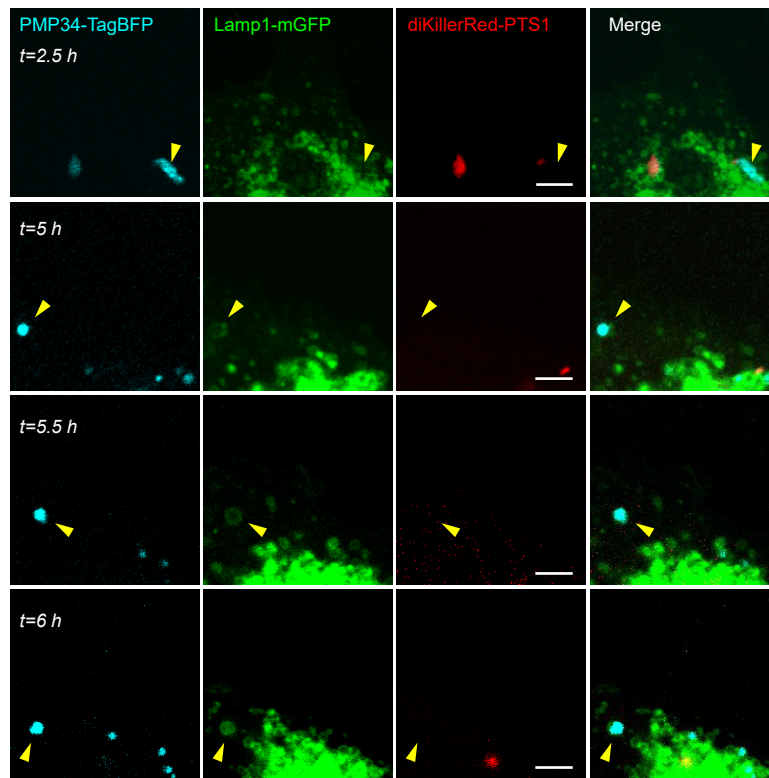

### Supplementary Figure 1: Delivery of ROS-stressed peroxisomes into lysosomes.

Specific peroxisomes (yellow arrowhead) within a NIH3T3 cell expressing Lamp1-mGFP, PMP34-TagBFP, and diKillerRed-PTS1, were 559 nm illuminated. Illuminated peroxisomes eventually colocalized with Lamp1-mGFP (n=3 cells). All scale bars: 5  $\mu$ m.

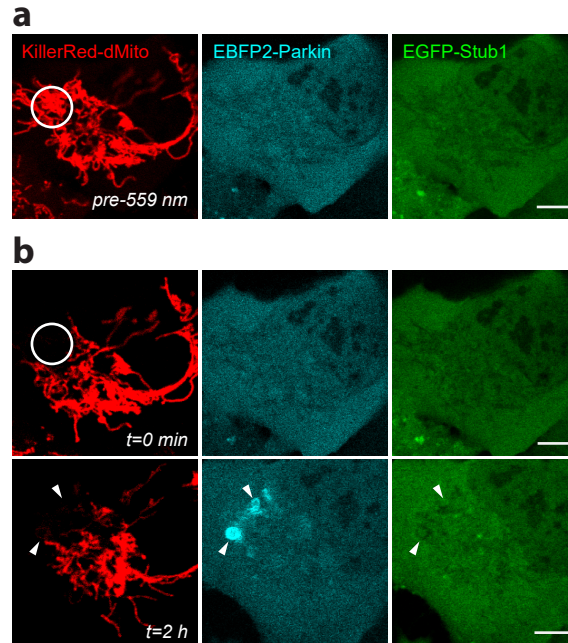

**Supplementary Figure 2: Stub1 does not translocate onto damaged mitochondria.**

**a** A HeLa cell expressing KillerRed-dMito, EGFP-Stub1 and EBFP2-Parkin. **b** Mitochondria were ROS-stressed through 559 nm illumination at the white circular region, leading to the immediate loss in KillerRed-dMito fluorescence (top panels). Two hours following illumination, EBFP2-Parkin accumulated on ROS-stressed mitochondria (white arrowheads, bottom panels). EGFP-Stub1, on the other hand, did not ( $n=3$  cells). All scale bars: 5  $\mu\text{m}$ .

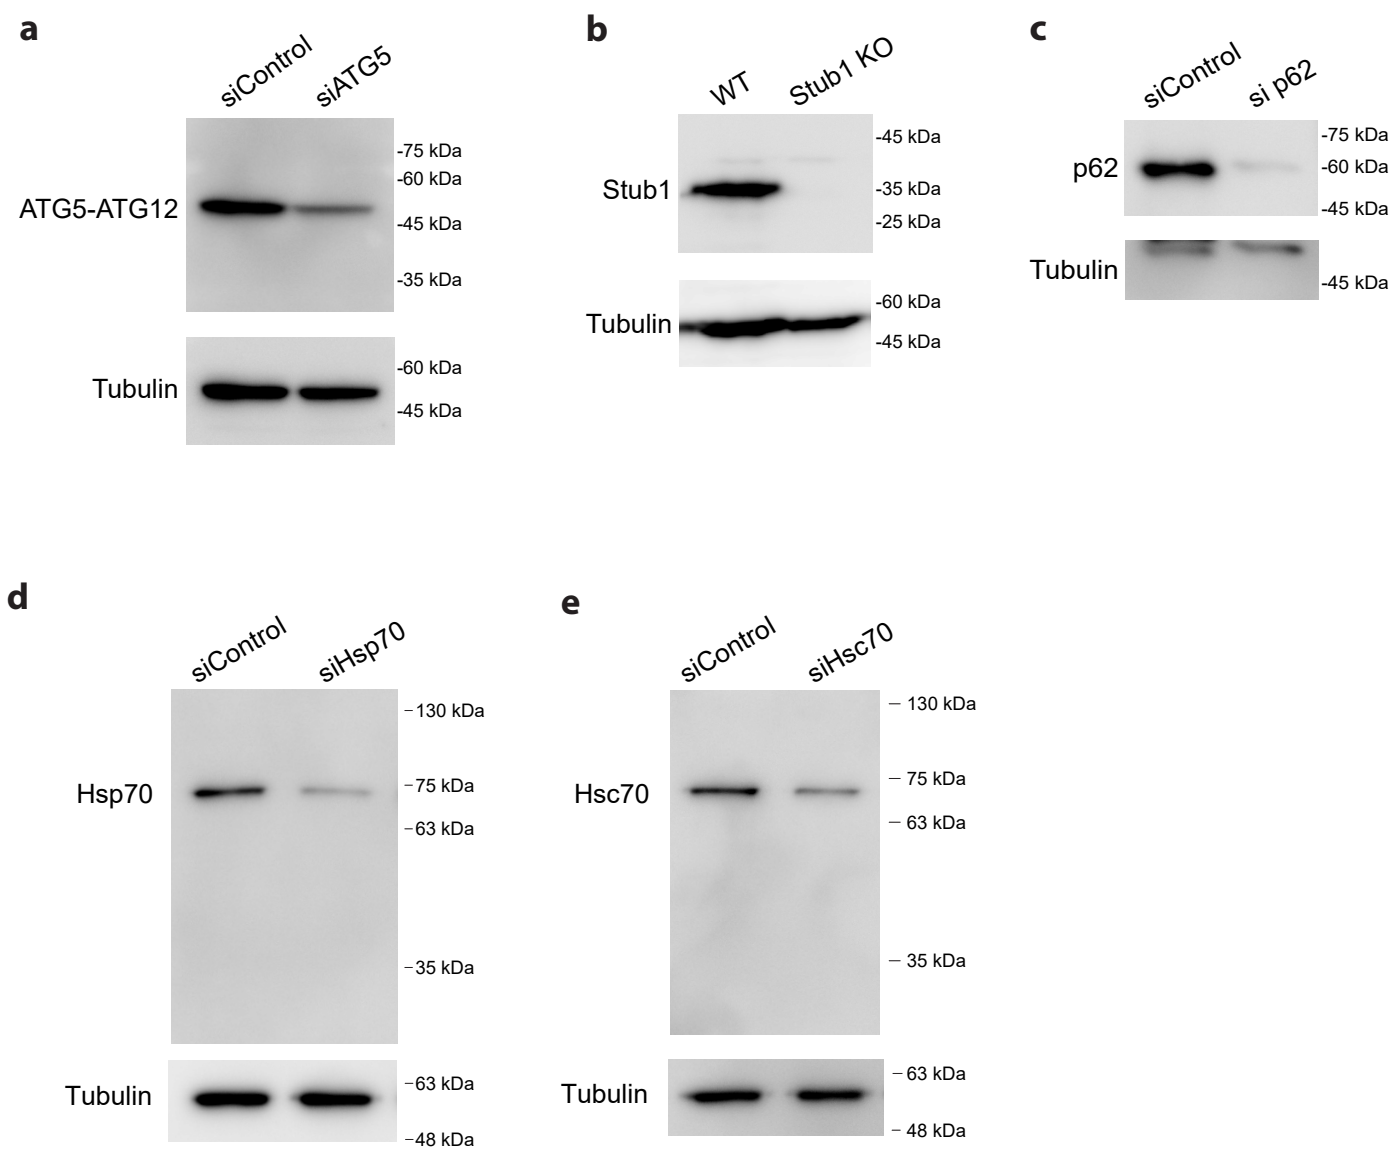

**Supplementary Figure 3: siRNA knockdowns efficiencies.**

**a** Efficiency of the ATG5 siRNA utilized in this paper (3 days after transfection). **b** Successful CRISPR/Cas9 mediated Stub1 knockout (Stub1 KO) in NIH3T3 cells. **c** Efficiency of the p62 siRNA utilized in this paper (3 days after transfection). **d-e** Efficiencies of the Hsp70 and Hsc70 siRNAs utilized in this paper. Source data are provided as a Source Data file.

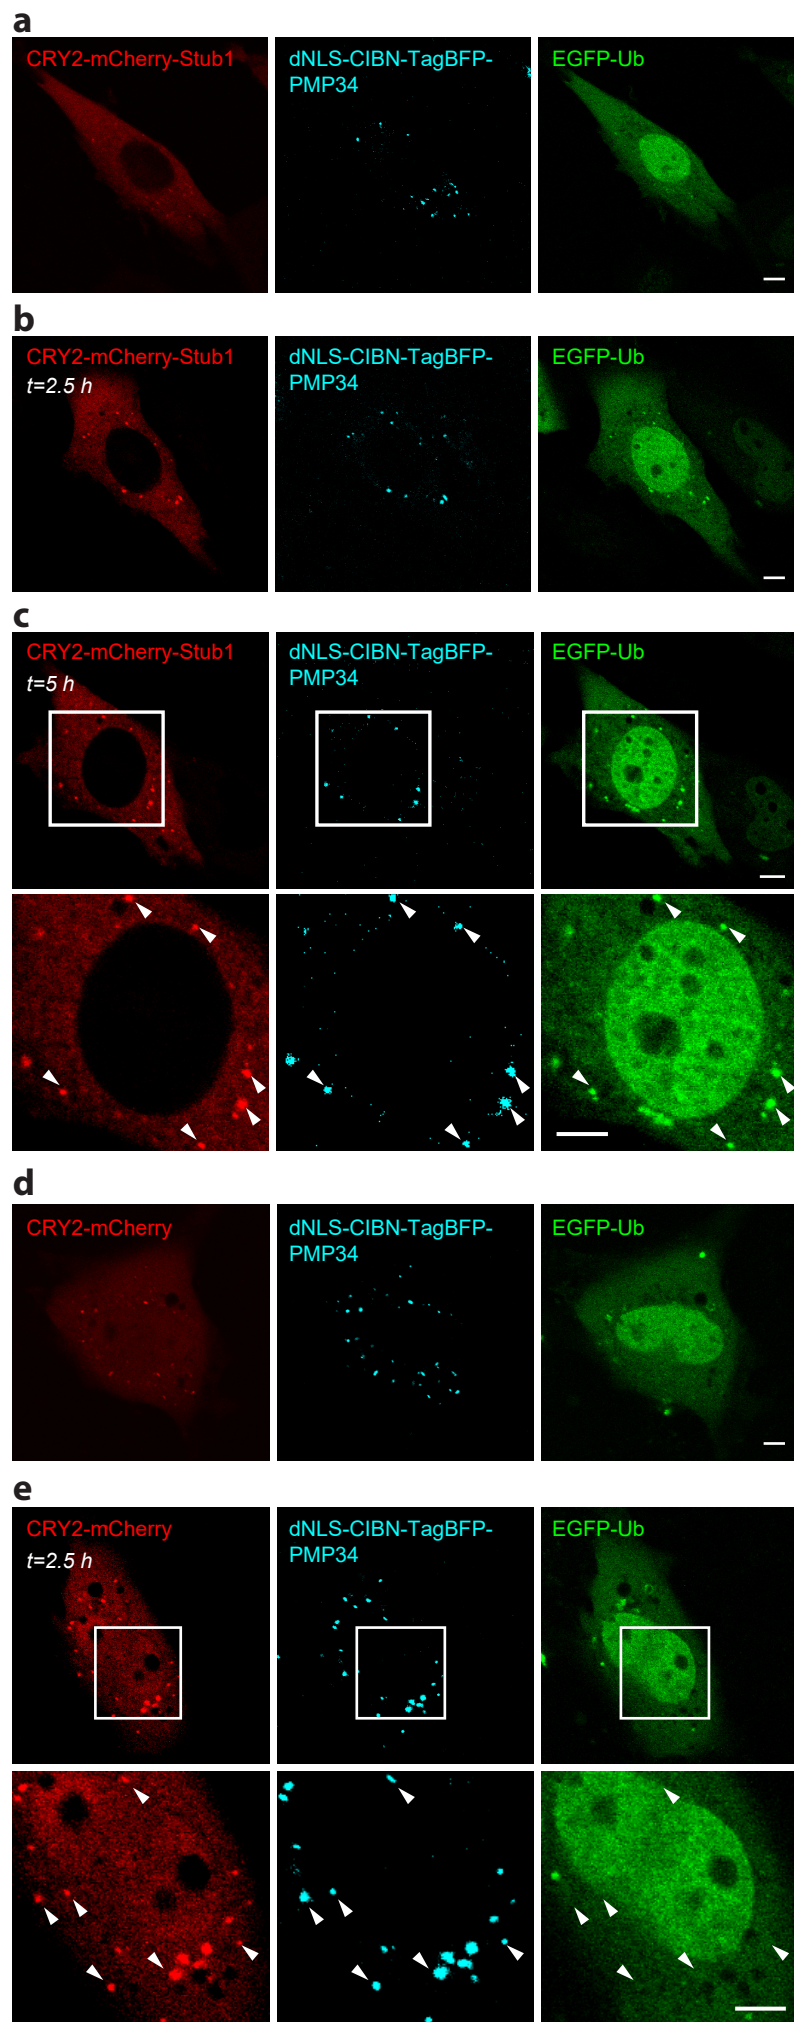

**Supplementary Figure 4: Stub1-mediated peroxisomal ubiquitination.**

A NIH3T3 cell expressing CRY2-mCherry-Stub1, dNLS-CIBN-TagBFP-PMP34 and EGFP-Ub was whole cell illuminated with 488 nm (19  $\mu$ W, 2 min) (a), leading to CRY2-mCherry-Stub1 translocation onto peroxisomes. This led to the observed EGFP-Ub accumulation on peroxisomes 2.5 (b) and 5 hours (c) after illumination. (c, bottom panels) Magnified view of the white square region in the top panels showing full colocalization between Ub (green), Stub1 (red) and dNLS-CIBN-TagBFP-PMP34 (cyan, white arrowheads; n=6 cells) d-e Targeting CRY2-mCherry alone onto peroxisomes did not trigger peroxisomal ubiquitination. d A NIH3T3 cell expressing CRY2-mCherry, EGFP-Ub and dNLS-CIBN-TagBFP-PMP34 was whole cell illuminated with 488 nm (19  $\mu$ W, 2 min), leading to CRY2-mCherry translocation onto dNLS-CIBN-TagBFP-PMP34 labeled peroxisomes. e However, no EGFP-Ub accumulation was seen 2.5 hours after illumination (bottom panels: magnified view of the white square region in the top panels, n=4 cells). All scale bars: 5  $\mu$ m.

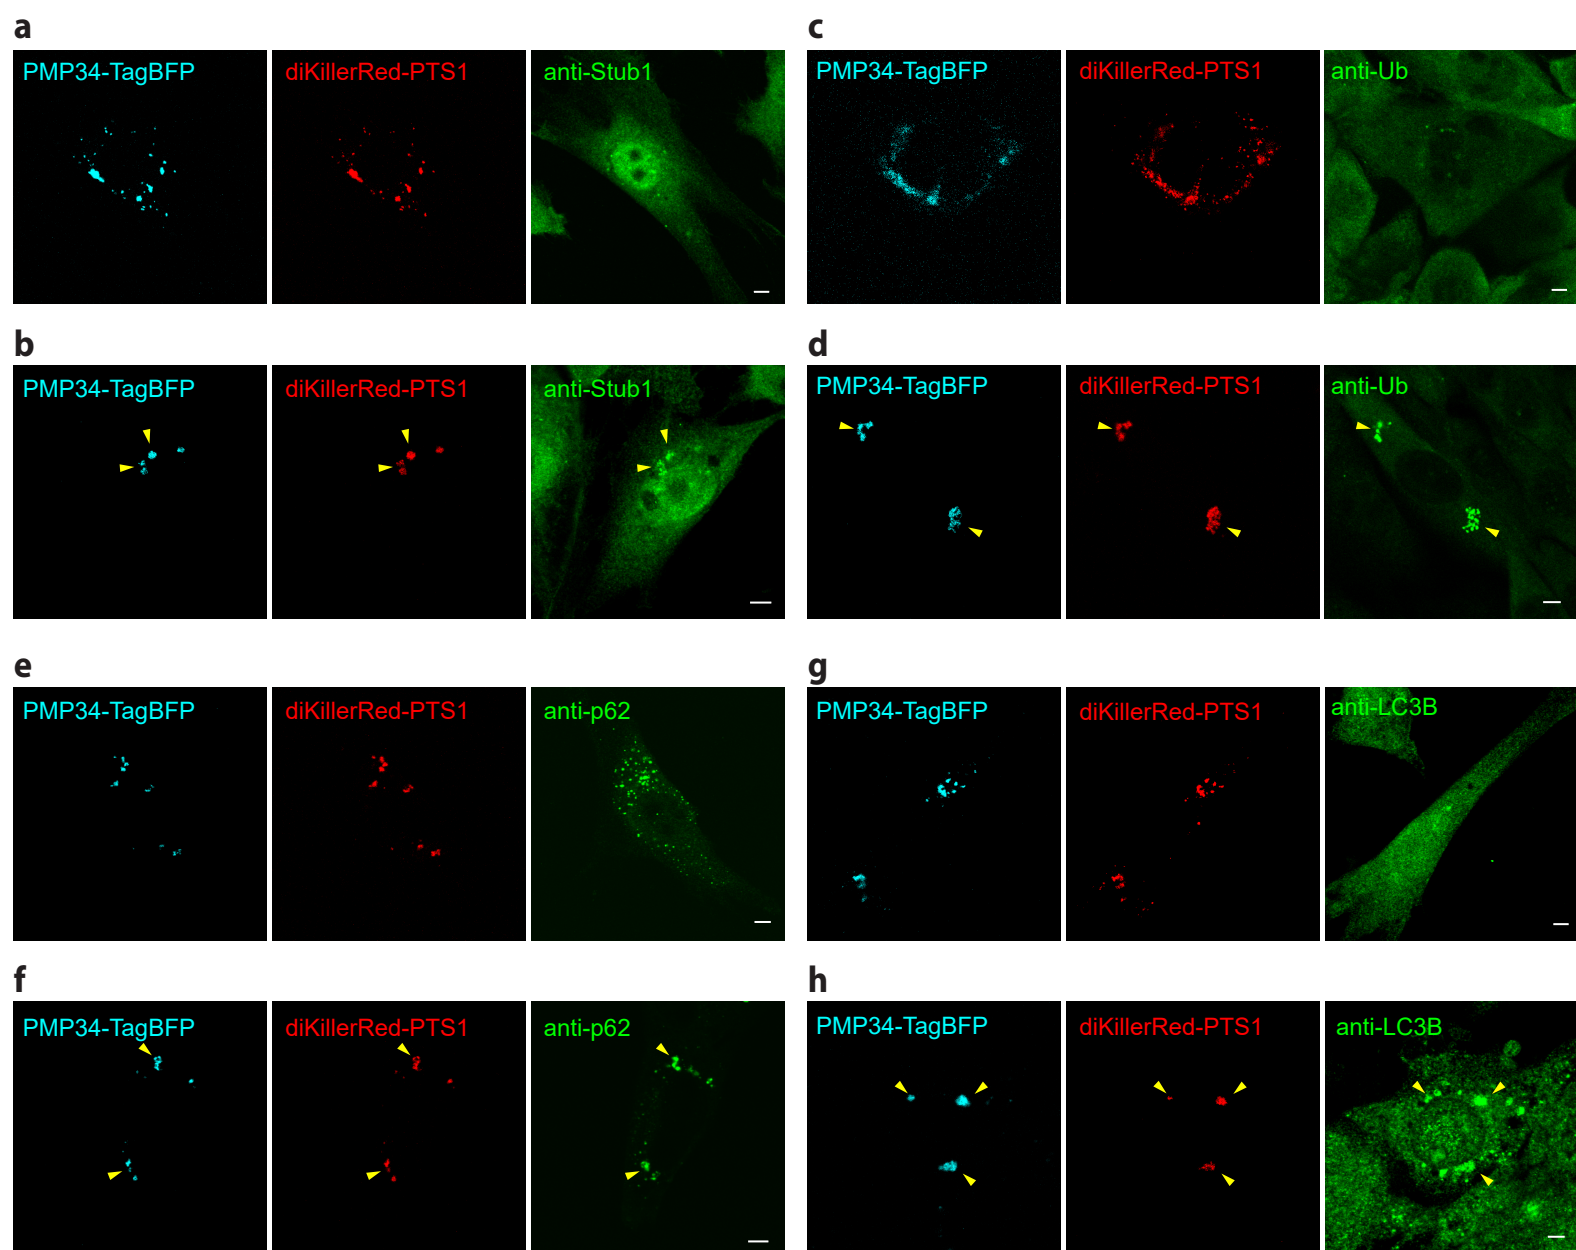

**Supplementary Figure 5: Stub1-mediated pexophagy probed through immunofluorescence.**

NIH3T3 cells expressing diKillerRed-PTS1 and PMP34-TagBFP before (**a**, **c**, **e**, **g**) and after (**b**, **d**, **f**, **g**) 565 nm illumination (LED; THORLABS, M565L2 500 mA, 9 hours). Immunofluorescence revealed that endogenous Stub1 (**b**), Ubiquitin (**d**), p62 (**f**), and LC3B (**h**) all accumulated on peroxisomes in 565 nm illuminated cells (yellow arrowheads). All scale bars: 5  $\mu$ m.

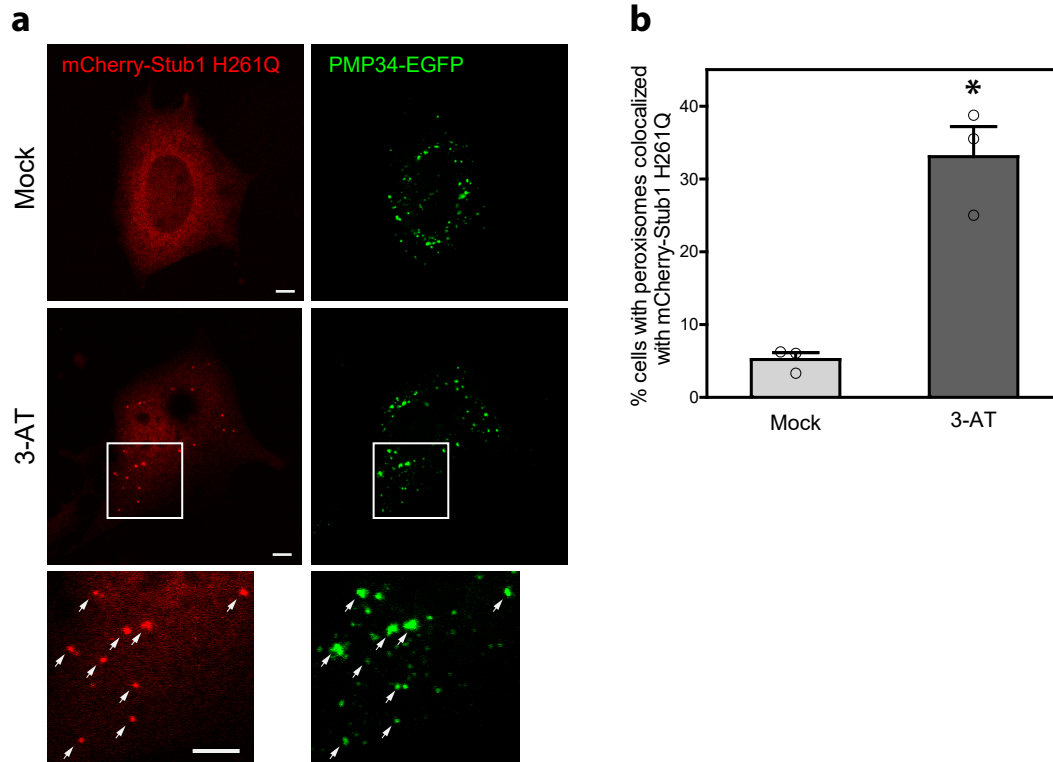

**Supplementary Figure 6: Catalase inhibition resulted in Stub1 accumulation on peroxisomes.**

**a** The mCherry-Stub1 H261Q accumulated on peroxisomes in catalase inhibitor 3-AT treated NIH3T3 cells (middle panels, 150  $\mu$ M for 14 hours,  $n=20$  cells; bottom panels, magnified view of the white square region in middle panels). On the other hand, mCherry-Stub1 H261Q did not accumulated on peroxisomes in non-treated cells (top panels). All scale bars: 5  $\mu$ m. **b** The percentage of cells with more than 3 peroxisomes colocalized with mCherry-Stub1-H261Q (Mock:  $n=32$ , 30 and 33 cells; 3-AT:  $n=31$ , 31 and 28 cells. \* $P=0.0013$  (one-tailed t-test)). All error bars represent the mean values + SEM. Source data are provided as a Source Data file.

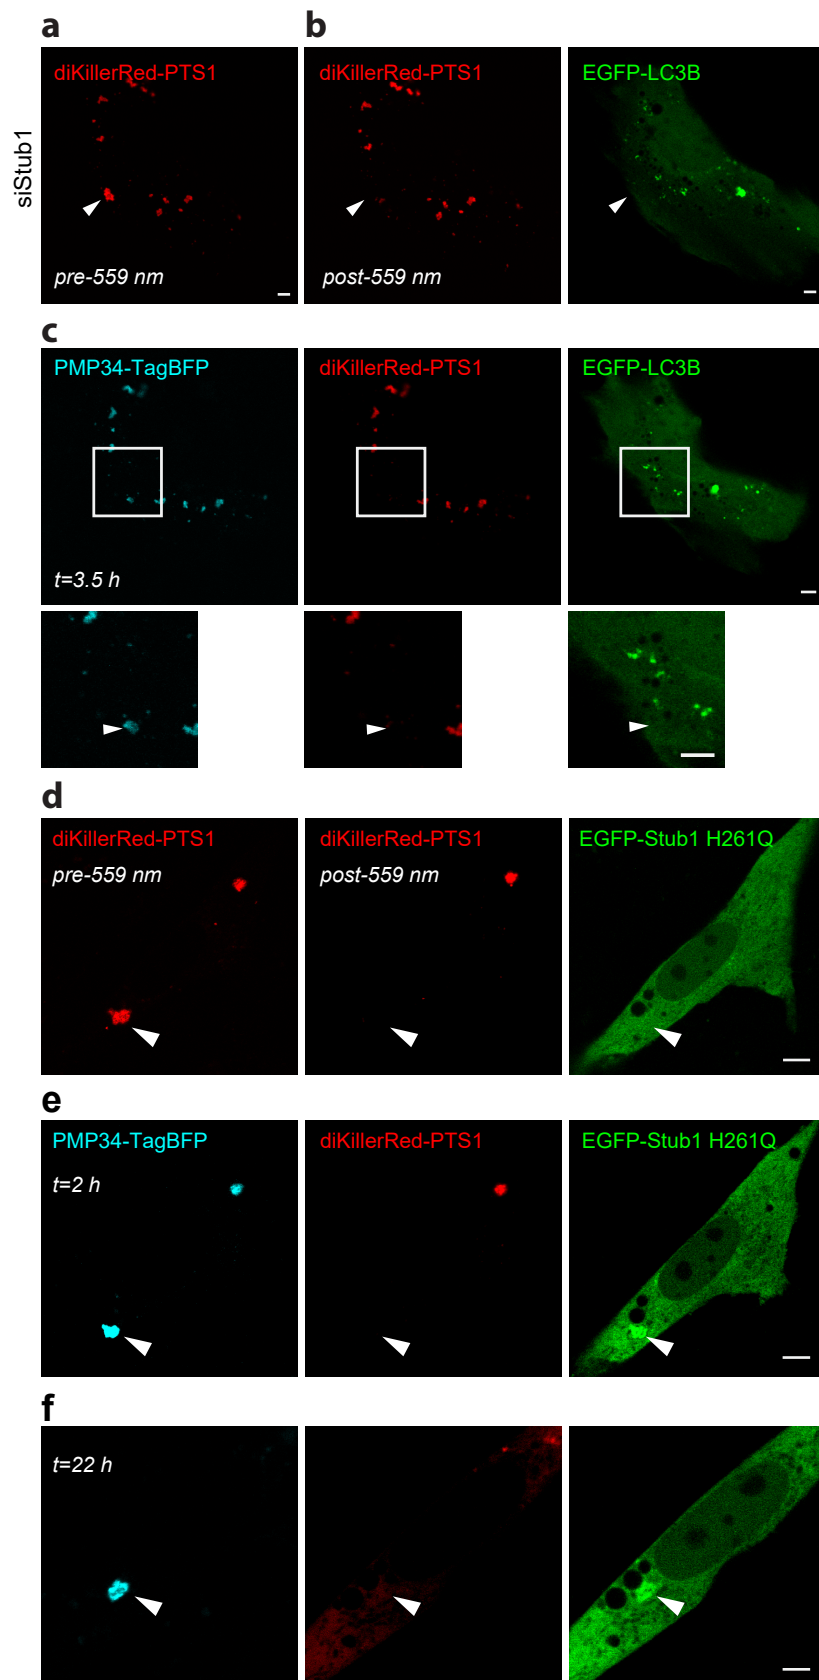

**Supplementary Figure 7: Stub1 depletion or Stub1 H261Q overexpression blocks pexophagy.**

**a** Specific peroxisomes (indicated by the white arrow) in a NIH3T3 cell transfected with diKillerRed-PTS1, PMP34-TagBFP, EGFP-LC3B, and siRNA against Stub1 (siStub1) were 559 nm illuminated (**b**, white arrowhead), leading to the immediate loss in diKillerRed-PTS1 fluorescence. **c** EGFP-LC3B did not accumulate onto ROS-stressed peroxisomes 3.5 hours after illumination. Bottom panels: magnified view of the white square in (**c**). **d-f** Overexpressing Stub1 ligase dead mutant H261Q blocks cellular turnover of ROS-stressed peroxisomes. **d** Specific peroxisomes in a NIH3T3 cell expressing diKillerRed-PTS1, PMP34-TagBFP and EGFP-Stub1 H261Q was 559 nm illuminated (left panel, white arrowhead), leading to the immediate loss in their diKillerRed-PTS1 fluorescence (middle and right panels). **e** ROS-stressed peroxisomes (white arrowhead, lacks diKillerRed-PTS1 fluorescence) remained detectable 2 hours and 22 hours (**f**) after 559 nm illumination (n=2 cells). All scale bars: 5  $\mu$ m.



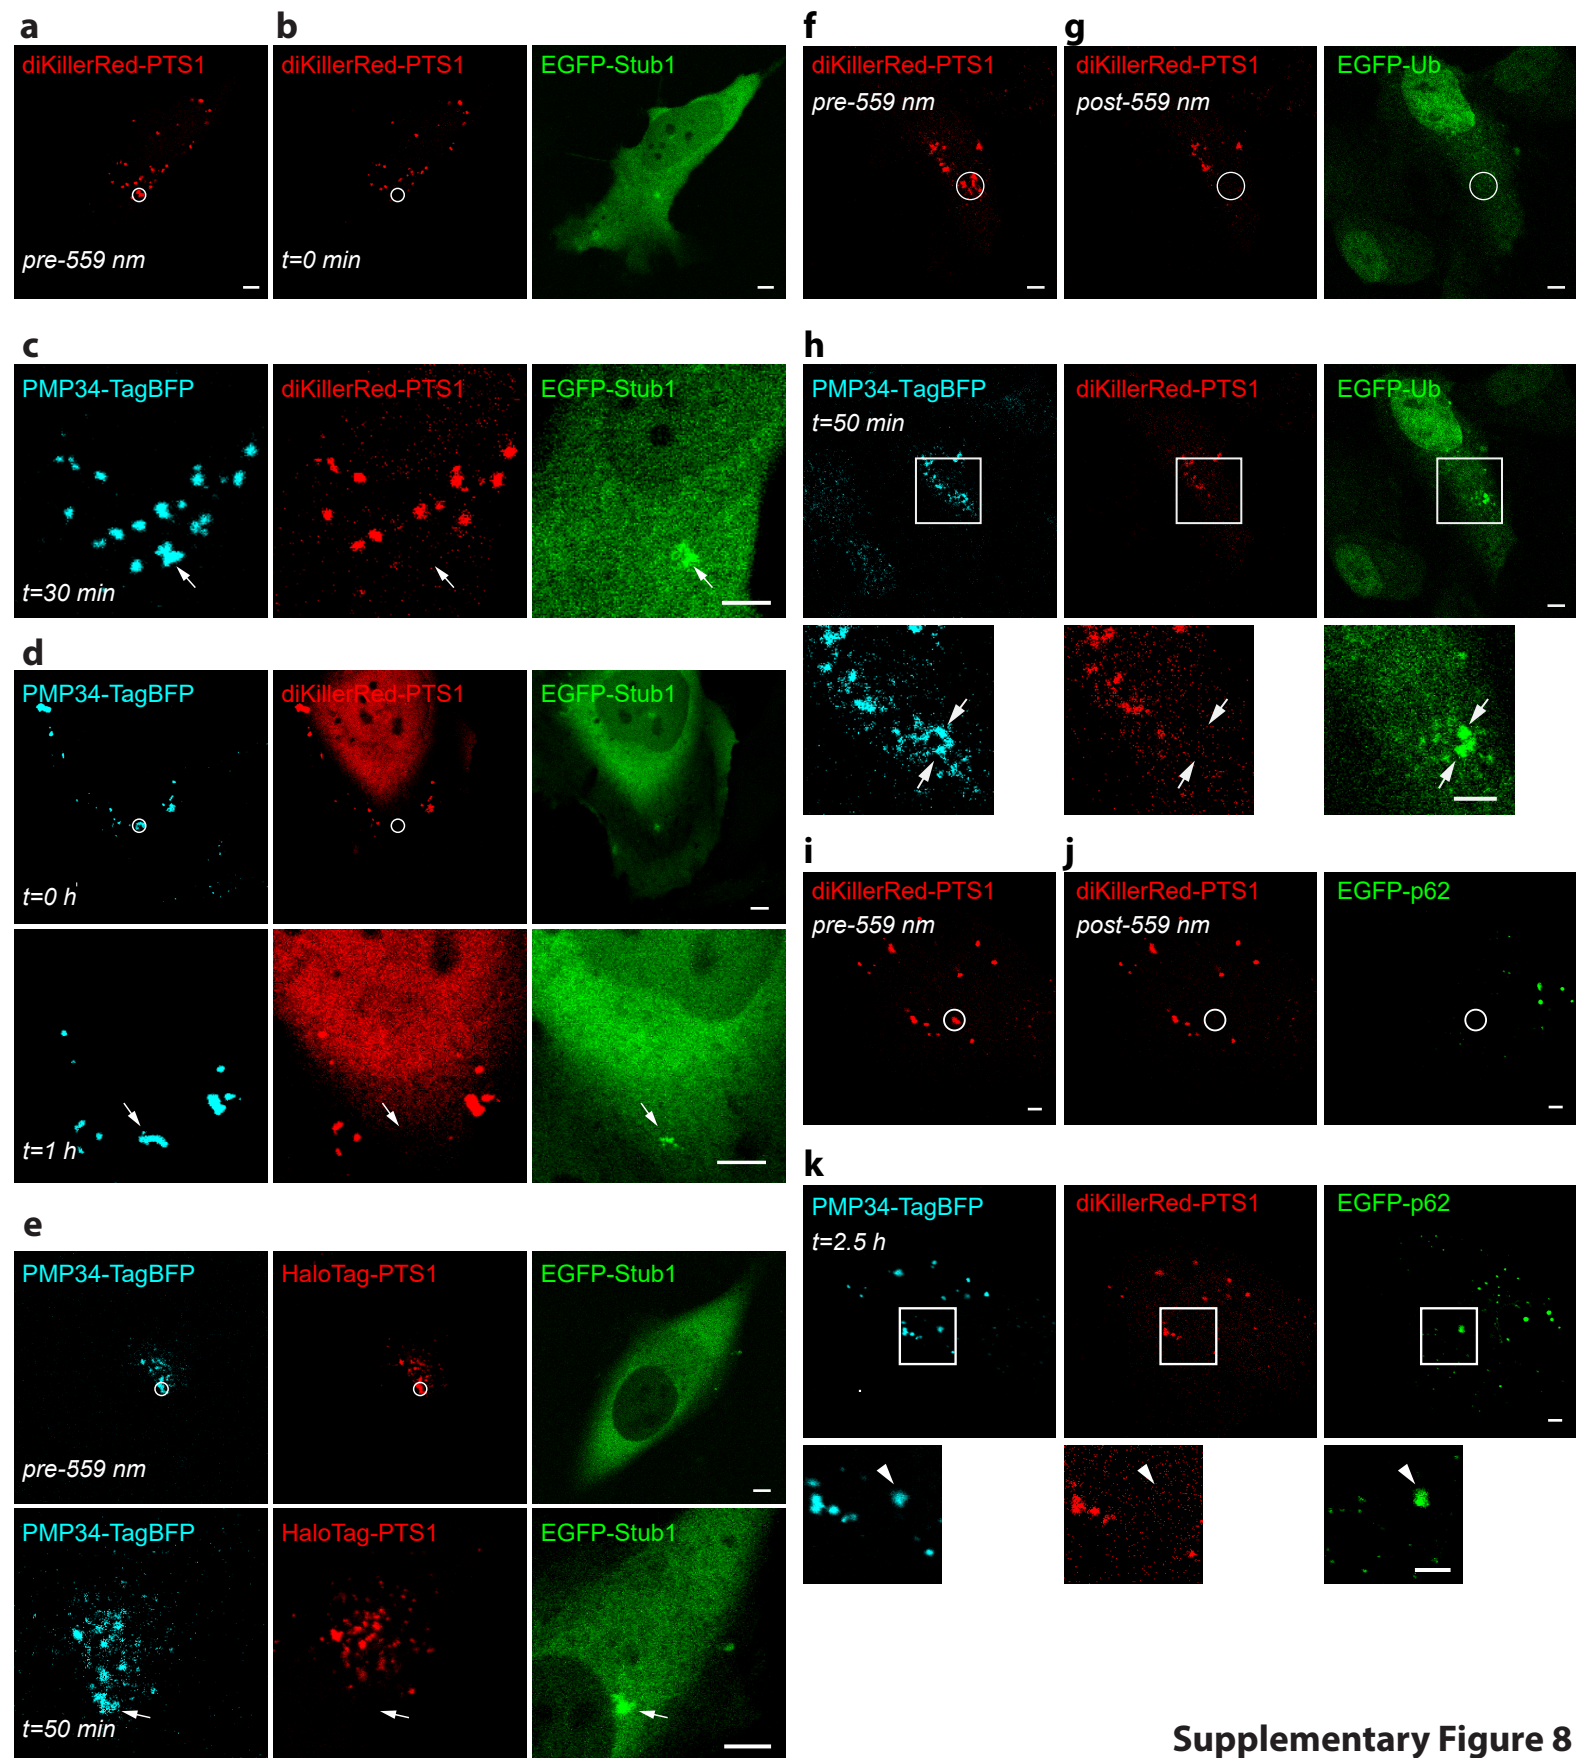

Supplementary Figure 8

**Supplementary Figure 8: Stub1-mediated pexophagy in human cell lines.**

A HeLa cell expressing diKillerRed-PTS1, PMP34-TagBFP and EGFP-Stub1 was 559 nm illuminated at the white circular region (**a**), leading to the immediate loss of diKillerRed-PTS1 fluorescence (**b**). Eventually EGFP-Stub1 accumulated on ROS-stressed peroxisomes (**c**, white arrows, n=11 cells). **d** As in (**a-b**), a HeLa cell right after 559 nm illumination (top panels). Eventually EGFP-Stub1 accumulated on ROS-stressed peroxisomes (bottom panels, white arrows). **e** A U2OS cell expressing HaloTag-PTS1, PMP34-TagBFP and EGFP-Stub1 was stained with the HaloTag TMR ligand (100 nM, 40 min), and 559 nm illuminated at the white circular region (top panels). Eventually EGFP-Stub1 accumulated on ROS-stressed peroxisomes (bottom panels, white arrows, n=10 cells). A HeLa cell expressing diKillerRed-PTS1, PMP34-TagBFP and EGFP-Ub was 559 nm illuminated at the white circular region (**f**), leading to the immediate loss of diKillerRed-PTS1 fluorescence (**g**). Eventually EGFP-Ub accumulated on ROS-stressed peroxisomes (**h**, white arrows, n=8 cells). A HeLa cell expressing diKillerRed-PTS1, PMP34-TagBFP and EGFP-p62 was 559 nm illuminated at the white circular region (**i**), leading to the immediate loss of diKillerRed-PTS1 fluorescence (**j**). Eventually EGFP-p62 accumulated on ROS-stressed peroxisomes (**k**, white arrows, n=7 cells). Bottom panels: magnified view of the white square region in the middle panels. All scale bars: 5  $\mu$ m.

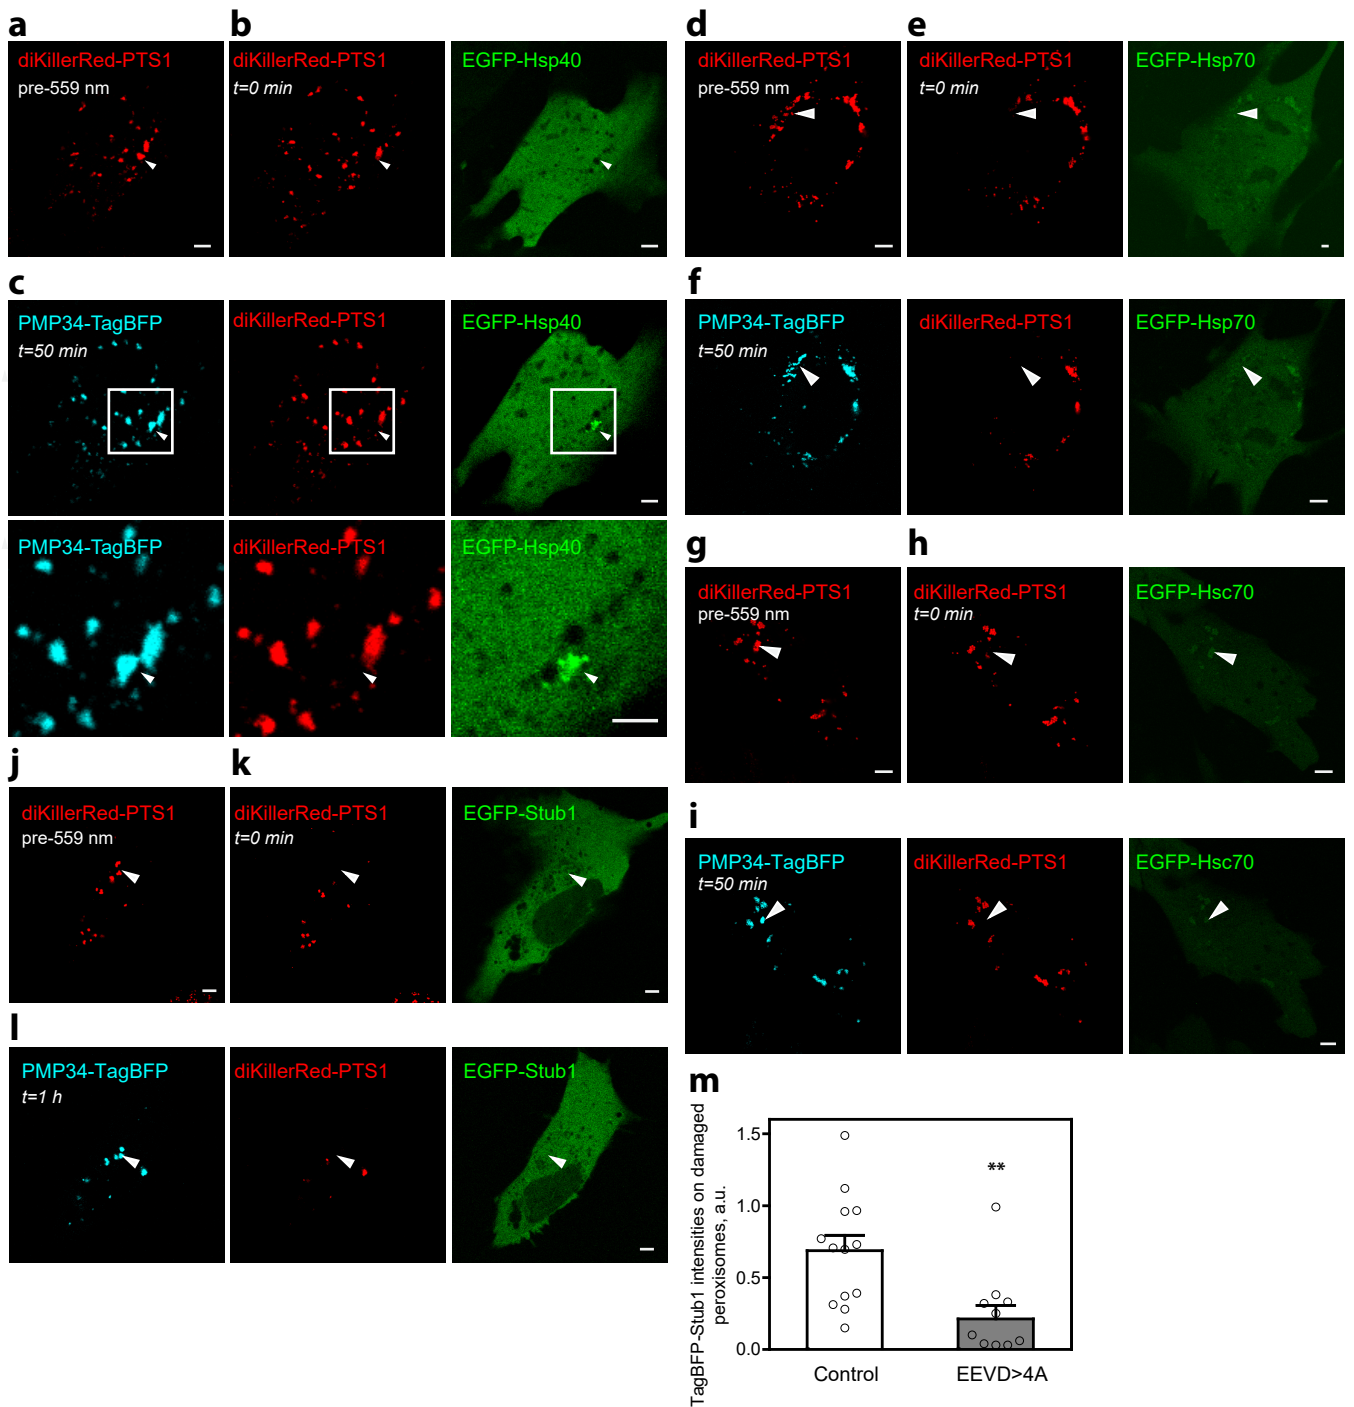

### Supplementary Figure 9: Heat-shock proteins in pexophagy.

**a-c** Hsp40 accumulates on ROS-stressed peroxisomes. **a** The peroxisomes indicated by the white arrowhead in a NIH3T3 cell expressing EGFP-Hsp40, diKillerRed-PTS1 and PMP34-TagBFP were 559 nm illuminated, leading to the immediate loss of diKillerRed-PTS1 fluorescence (**b**). Later (50 minutes after illumination shown) EGFP-Hsp40 accumulated on ROS-stressed peroxisomes (**c**, top panels, white arrowheads, n=7 cells). Bottom panels: magnified view of white square region in the top panels (white arrowheads indicate ROS-stressed peroxisomes). **d-i** PES-C1 inhibits Hsp70, Hsc70 and Stub1 accumulations on ROS-stressed peroxisomes. The peroxisomes indicated by the white arrowhead in a PES-C1 treated NIH3T3 cell expressing diKillerRed-PTS1, PMP34-TagBFP and EGFP-Hsp70 was 559 nm illuminated (**d**), leading to the immediate loss of diKillerRed-PTS1 fluorescence (**e**). PES-C1 blocked EGFP-Hsp70 accumulation on ROS-stressed peroxisomes (**f**, white arrowheads, n=10 cells). The peroxisomes indicated by the white arrowhead in a PES-C1 treated NIH3T3 cell expressing diKillerRed-PTS1, PMP34-TagBFP and EGFP-Hsc70 was 559 nm illuminated (**g**), leading to the immediate loss of diKillerRed-PTS1 fluorescence (**h**). PES-C1 blocked EGFP-Hsc70 accumulation on ROS-stressed peroxisomes (**i**, white arrowheads, n=12 cells). The peroxisomes indicated by the white arrowhead in a PES-C1 treated NIH3T3 cell expressing diKillerRed-PTS1, PMP34-TagBFP and EGFP-Stub1 was 559 nm illuminated (**j**), leading to the immediate loss of diKillerRed-PTS1 fluorescence (**k**). PES-C1 blocked EGFP-Stub1 accumulation on ROS-stressed peroxisomes (**l**, white arrowheads, n=6 cells). **m** Quantifying TagBFP-Stub1 accumulation on ROS-stressed peroxisomes (in NIH3T3 cells expressing diKillerRed-PTS1, PMP34-EGFP and TagBFP-Stub1). Overexpressing EGFP-Hsp70 EEVD>4A reduced TagBFP-Stub1 accumulation (50 min after 559 nm illumination, n=13 and 11 cells) \*\*P=0.0016 (one-tailed t-test). All error bars represent the mean values + SEM. All scale bars: 5  $\mu$ m. Source data are provided as a Source Data file.

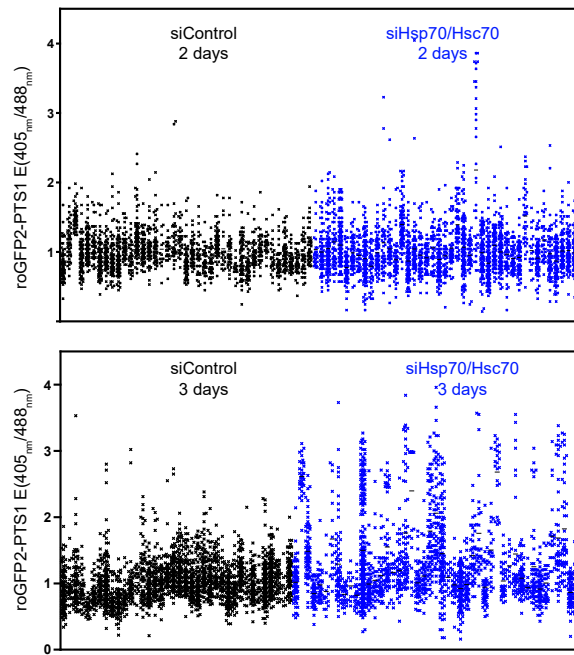

**Supplementary Figure 10: Hsc70/Hsp70 depletion led to cellular accumulation of oxidatively-stressed peroxisomes.**

Each dot within the plots represents roGFP2-PTS1 emission ratio (between 405 nm and 488 nm excitation) of one peroxisome, and a column denotes all peroxisomes within a single cell. The ratios for Hsc70/Hsp70 depleted cells vs. that of control cells are shown (top: 48 hrs after depletion; bottom: 72 hrs after depletion). Source data are provided as a Source Data file.

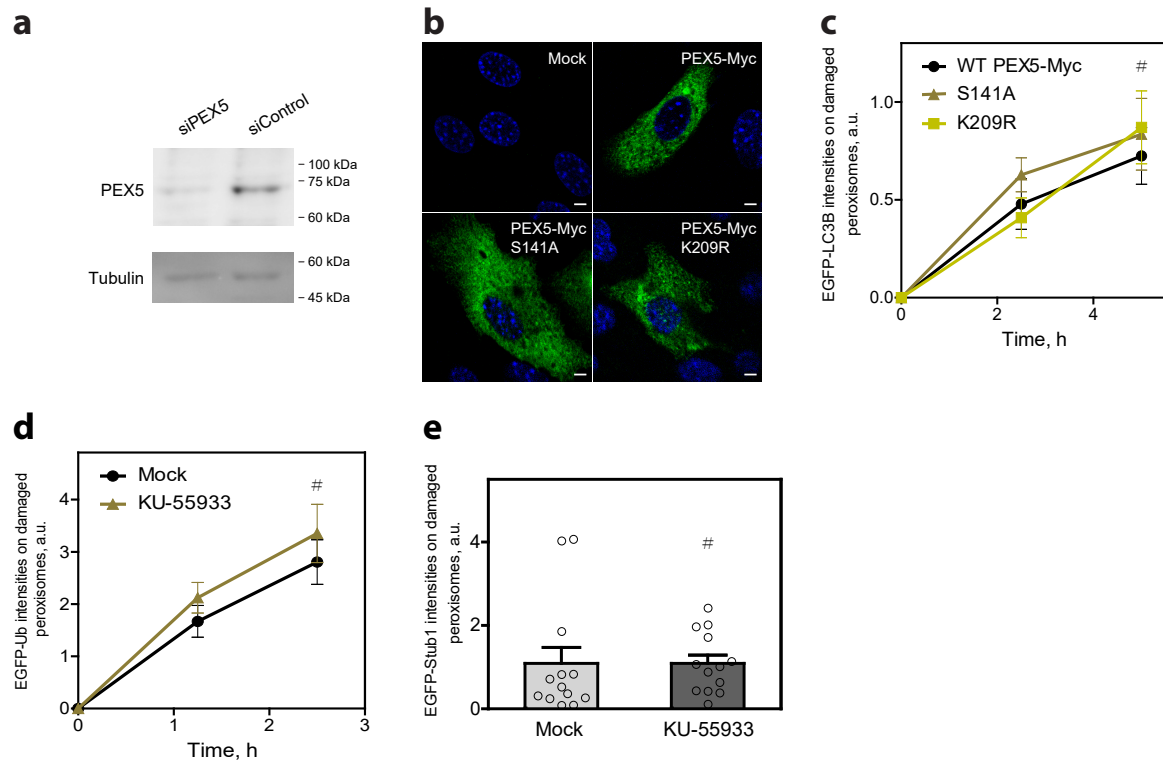

### Supplementary Figure 11: The effects of ATM inhibition on this pexophagy.

**a** Efficiency of the PEX5 siRNA utilized in this paper (3 days after transfection). **b** The expressions of PEX5-Myc (wild-type or the indicated mutants) were immunostained with the anti-Myc antibody 3 days after transfection. All scale bars: 5  $\mu$ m. **c** The accumulation of EGFP-LC3B on the 559 nm light illuminated peroxisomes in NIH3T3 cells transfected with EGFP-LC3B, PMP34-TagBFP, diKillerRed-PTS1, PEX5 siRNA, and wild-type PEX5-Myc or the indicated PEX5 mutants 3 days after transfection. (n=19, 17 and 11 cells. #P=0.3169 (WT vs. S141A) P=0.2731 (WT vs. K209R) (one-tailed t-test)). **d** The NIH3T3 cells were transfected with EGFP-Ub, PMP34-TagBFP and diKillerRed-PTS1 and pretreated with the ATM inhibitor KU-55933 (500 nM, 2 hrs) before 559 nm illumination. The accumulations of EGFP-Ub on 559 nm light illuminated peroxisomes were quantified (n=16 and 17 cells respectively, #P=0.2225 (one-tailed t-test)). All error bars in (c-d) represent the mean values  $\pm$  SEM. **e** The effect of the ATM inhibitor KU-55933 (500 nM, 2 hrs) on EGFP-Stub1 accumulation were determined (in non-treated or KU-55933 pretreated NIH3T3 cells expressing diKillerRed-PTS1, PMP34-TagBFP and EGFP-Stub1) by quantifying the translocated EGFP-Stub1 on ROS-stressed peroxisomes (50 min after 559 nm illumination, n=13 and 13 cells #P=0.4993 (one-tailed t-test)). All error bars represent the mean values + SEM. Source data are provided as a Source Data file.

## Supplementary Tables

**a**

| Target Gene  | Target Sequence                 | Genomic Location             |
|--------------|---------------------------------|------------------------------|
| <i>Stub1</i> | AGCGATCAGCTCCGCCCGGT <b>CGG</b> | Ch.17: +25832913 – +25832935 |
| <i>Stub1</i> | GCGAGCGAGCCATCGAGTCC <b>AGG</b> | Ch.17: +25832595 – +25832617 |

**b**

| sgRNA Template | Template Sequence                                                                                                                                                           |
|----------------|-----------------------------------------------------------------------------------------------------------------------------------------------------------------------------|
| mStub1 sgRNA 1 | TAA TAC GAC TCA CTA T <b>AGCGATCAGCTCCGCCCGGT</b> GT TTT AGA<br>GCT ATG CTG GAA ACA GCA TAG CAA GTT AAA ATA AGG CTA GTC<br>CGT TAT CAA CTT GAA AAA GTG GCA CCG AGT CGG TGC  |
| mStub1 sgRNA 2 | TAA TAC GAC TCA CTA TA <b>GCGAGCGAGCCATCGAGTCC</b> GT TTT AGA<br>GCT ATG CTG GAA ACA GCA TAG CAA GTT AAA ATA AGG CTA GTC<br>CGT TAT CAA CTT GAA AAA GTG GCA CCG AGT CGG TGC |

### Supplementary Table 1: Designs for generating *Stub1* knockout cells.

**a** Target sequences chosen for generating *Stub1* knockout NIH3T3 cells. **b** The sgRNAs were used in generating *Stub1* knockout NIH3T3 cells (each including a T7 promoter, a 20 nt target sequence (without PAM), and a published sgRNA scaffold in blue).

| Constructs             | Primers                                                                                                                                                                                          | Sequences (5'→3')                                                                                                                                                                                                                                                                                                                                                                                                                                                    |
|------------------------|--------------------------------------------------------------------------------------------------------------------------------------------------------------------------------------------------|----------------------------------------------------------------------------------------------------------------------------------------------------------------------------------------------------------------------------------------------------------------------------------------------------------------------------------------------------------------------------------------------------------------------------------------------------------------------|
| PMP34-TagBFP           | NheI-PMP34-F<br>PMP34-NheI-R                                                                                                                                                                     | GCGAGCGCTAGCATGGCTTCCGTGCTGTCTACG<br>GCACTCGCTAGCCCGGAACCGCTCCGTGTTGGTGTGCACGCTTCAGC                                                                                                                                                                                                                                                                                                                                                                                 |
| EGFP-Stub1             | XhoI-Stub1-F<br>Stub1-XmaI-R                                                                                                                                                                     | CGCGCGCTCGAGGCATGAAGGGCAAGGAGAAAAGGA<br>CGCGCGCCCGGGTTAATAGTCTCTACCCAGCCGTTCTCAG                                                                                                                                                                                                                                                                                                                                                                                     |
| diKillerRed-PTS1       | KpnI-Vec-F<br>KillerRed Vec-R<br>KillerRed-F<br>KillerRed-R<br>VSKL-F<br>VSKL-R                                                                                                                  | GCGCGGGTACCGCGGCCCGG<br>CTACCGCTACCTGTGCTACCTGTGCCATGATCCTCGCTACCGATGGC<br>CAGCGGTACAGCGCTAGCGAGGATAAATAACATGGCTATGGGTTACAGAGGGCGGCC<br>GCGCGGGTACCTTATCAATCCTCGTCCGTACCGATGGC<br>GTCAAAGTCGAAGCTCTAAAGATAACTGATCATATAACAGCCATACCACAT<br>AGATCCGGTGGATCCCGGG                                                                                                                                                                                                         |
| EGFP-Hsp70             | Hsp70-EcoRI-F<br>Hsp70-BamHI-R                                                                                                                                                                   | GCGCGGAATTCTGGAGGAGGATCTATGGCCAAAGCCCGGGC<br>GCGCGGGATCCCTAATCTACCTCCTCAATGGTGGGGCC                                                                                                                                                                                                                                                                                                                                                                                  |
| roGFP2-PTS1            | PTS1 Vector-F<br>Vector-AgeI-R<br>AgeI-roGFP2-F<br>roGFP2-R                                                                                                                                      | GTCAAAGTCGAAGCTCTAAAGATAACTGATCATAATCAGCCATACCACAT<br>GCGCGCACCGGTAGCGCTAGCGGATCT<br>GCGCGCACCGGTATGTTTTTCAACAGACTAAGCGCTGG<br>CAAATTCGTCGTGCTTGTAACAATTCG                                                                                                                                                                                                                                                                                                           |
| PMP34-PAGFP            | NheI-PMP34-F<br>PMP34-AgeI-R                                                                                                                                                                     | GCGAGCGCTAGCATGGCTTCCGTGCTGTCTACG<br>CGCGCGACCGGTCCGTGTTGGTGTGCACGCTTCAGC                                                                                                                                                                                                                                                                                                                                                                                            |
| CRY2-mCherry-Stub1     | XhoI-Stub1-F<br>Stub1-XmaI-R                                                                                                                                                                     | CGCGCGCTCGAGGCATGAAGGGCAAGGAGAAAAGGA<br>CGCGCGCCCGGGTTAATAGTCTCTACCCAGCCGTTCTCAG                                                                                                                                                                                                                                                                                                                                                                                     |
| dNLS-CIBN-TagBFP-PMP34 | NheI-CIBN-F<br>CIBN-NheI-R<br>delete NLS-F<br>delete NLS-R<br>Sall-KpnI-PMP34-F<br>PMP34-BamHI-R                                                                                                 | GCGCGGGCTAGCATGAATGGAGCTATAGGAGGTGACCTTT<br>GCGCCCGCTAGCCCGGACCCACCACTCCAGAGC<br>AGACTAAGGATTGTAATGAGCGCGCAAGAAAGATGACGATGAACAGAGATGACC<br>CTGTATCAAACCTCGCTGCCTGAAATTTCCAGTCCCAAGCGT<br>GCGCGCGTGCAGCGGTACCATGGCTTCCGTGCTGTCTACG<br>GCGCGGGATCCCTCAGTGTGGTGTGCACGCTTCAGC                                                                                                                                                                                            |
| TagBFP-hStub1          | EcoRI-hStub1-F<br>hStub1-BamHI-R                                                                                                                                                                 | GCGCGGAATTCAGGTGGTTCAGGTGGTGGATCTGGTATGAAGGCAAGGAGGAGAAGGA<br>GCGCGGGATCCCTTAGTGTCTCCACCCAGCCATTC                                                                                                                                                                                                                                                                                                                                                                    |
| EGFP-p62               | EcoRI-p62-F<br>p62-KpnI-R                                                                                                                                                                        | GCGCGGAATTCATGGCGTCCCTCACCGTGA<br>GCGCGGGTACCTCACAACGGCGGGGGATGCT                                                                                                                                                                                                                                                                                                                                                                                                    |
| EGFP-Hsp40             | XhoI-DNAJA1-F<br>DNAJA1-BamHI-R                                                                                                                                                                  | GCGCGCGCTCGAGCTATGGTAAAGAAACAATTAACGATGTTT<br>GCGCGCGGATCCCTAAGAGGTCTGACACTGAACACCACTC                                                                                                                                                                                                                                                                                                                                                                               |
| HaloTag-PTS1           | Halo-PTS1-F<br>Halo-PTS1-R                                                                                                                                                                       | CGAGCTGTGAACAGATCCTGAGTTTG<br>CTACTATAGTTTAGACTTAACAGATCTGAGTCCGGAGCCGGA                                                                                                                                                                                                                                                                                                                                                                                             |
| PMP34-EGFP             | NheI-PMP34-F<br>PMP34-AgeI-R                                                                                                                                                                     | GCGAGCGCTAGCATGGCTTCCGTGCTGTCTACG<br>CGCGCGACCGGTCCGTGTTGGTGTGCACGCTTCAGC                                                                                                                                                                                                                                                                                                                                                                                            |
| PMP34-EGFP-TagBFP2     | 34GB-F<br>34GB-R                                                                                                                                                                                 | GGTGAAGCGCCACCATGAGCGAGCTG<br>ACCGGTGGATCCCGGGCC                                                                                                                                                                                                                                                                                                                                                                                                                     |
| mCherry-Stub1 H261Q    | delCRY2-F<br>delCRY2-R                                                                                                                                                                           | ATGGTGAGCAAGGGCGAGGA<br>CATGCTAGCGGATCTGACGGTTC                                                                                                                                                                                                                                                                                                                                                                                                                      |
| mutagenesis            | H261Q-F<br>H261Q-R<br>K31A-F<br>K31A-R<br>EEVD>4A-F<br>EEVD>4A-R<br>N65S-F<br>N65S-R<br>A79D-F<br>A79D-R<br>L123V-F<br>L123V-R<br>K144X-F<br>K144X-R<br>M240T-F<br>M240T-R<br>T246M-F<br>T246M-R | CAGCTGCAGCGTGTGGGCCACT<br>CTCCTCAATGTCTTGGCGTCA<br>GCAGAGCAGGAAACCGGCTCTC<br>GAGCTTTCGCACTCGGG<br>GGATCCACCGGATCTAGATAACTGATC<br>CTAGGCAGCCGAGCAATGGTGGGGCCTGACCCA<br>TCTCGGGCCTTGCTACCTGAAG<br>GGTGAATACACGCCACCAGC<br>CCTGGCCGACTCCCGG<br>TCCTGCTGTGCTGCTGCATC<br>TGGCCAAGGAGCAGCGGC<br>CGCTGTAAGCTCGCTGCAGATTGG<br>AGAAGCGCTGGAACAGCATTGAG<br>ACTTCGATTCGAAGAGCGC<br>GCGGGAGCCGTGCATCA<br>GTCAGCTCAAAGCTGATCTTGCCA<br>GCCAGTGGCATCACCTACGA<br>ATGATGCACGGCTCCCGCA |
| PEX5-Myc               | PEX5-F<br>PEX5-R<br>Myc-F<br>Myc-R<br>TAGa-F<br>TAGa-R<br>S141A-F<br>S141A-R<br>K209R-F<br>K209R-R                                                                                               | GCGAGCGCTAGCATGGCAATGCGGGAGCTGG<br>GCACGCGCTAGCTCACTGGGGCAGGCCAAACATAG<br>CTCATTTCTGAAGAGGACTTGAATGAGCTAGCGGTCCGCCACCAT<br>CTTTTGTCCATAGAACAGAACCCCTGGGGCAGGCCAAACATAGTTA<br>AATGAGCTAGCGGTCCGCCACC<br>TCTCAAAGTCTCTCAAAAATGAGCTTTTG<br>GCCCAAGAATTCATCTCTGAAGTTACAGACC<br>CCAGTCACTCTCATTATACTCGATTACATC<br>GATTGGCTAATCTGAGTTCTGAAAATTCG<br>TGGGGTCACTCCACTTTGGCCACAA                                                                                              |

**Supplementary Table 2: Primers used for plasmid construction**
